# Supplementary material for: Social Demography of Transitional Dietary Patterns in Thailand: Prospective Evidence from the Thai Cohort Study
Source: MDPI journal article supplement (doi:10.3390/nu9111173), 2017-10-27
Supplement: s1 [file s1]

**Table S1:** Food items and food groups derived from the food frequency questionnaire

| <b>Food group</b>              | <b>FFQ food items</b>                                        |
|--------------------------------|--------------------------------------------------------------|
| Meat                           | Beef, pork, chicken, duck meat without skin                  |
| Fatty meat                     | Beef, pork, chicken or duck with added skin                  |
| Processed meat (fatty)         | Processed meat high in fat (i.e. sausage)                    |
| Processed Meat (salted)        | Processed meat high in salt (i.e. dried/salted fish or meat) |
| Fish                           | Fresh and salt water fish                                    |
| Shellfish and squid            | Shrimp, shellfish, crab, squid                               |
| Animal organs                  | Liver from pig, duck or chicken                              |
| Egg                            | Egg                                                          |
| Beans                          | Legumes and their products (i.e. mung, soy, tofu)            |
| White rice                     | White rice                                                   |
| Brown rice                     | Brown rice                                                   |
| Glutinous rice                 | Sticky rice                                                  |
| Rice noodles                   | Rice noodles                                                 |
| Wheat                          | White bread, wholemeal bread                                 |
| Deep fried and western food    | Deep fried pork, Pizza, hamburgers                           |
| Food with coconut milk         | Curry style dishes (i.e. Tom Kha, red curry)                 |
| Fermented fish or soybean      | Fermented salted fish, fermented beans                       |
| Chili sauce dip                | Chilli sauces (i.e. nam prik)                                |
| Fruit                          | Sweet (i.e. Papaya, lychee) and non-sweet (i.e. green apple) |
| Fruit with added sugar         | Candied fruit, fruit paste                                   |
| Processed fruit                | Dried, canned, pickled                                       |
| Milk                           | Fresh milk, yoghurt,                                         |
| Soy milk                       | Soy milk                                                     |
| Beverages                      | Sweetened milk, soft drink, energy drinks, sports drinks     |
| Fruit or vegetable juice       | Fruit or vegetable juice                                     |
| Tea or coffee                  | Tea or coffee                                                |
| Sweet snacks                   | Dessert (with sweet syrup, coconut milk, yolk), baked goods  |
| Salt snacks (highly processed) | Potato chips, Instant noodles                                |
| Bamboo shoots                  | Bamboo shoots                                                |
| Vegetables                     | Vegetables                                                   |

**Table S2:** Participants *versus* non-participants in the 2015 TCS dietary survey

| Characteristics in 2013      | Non-participants* | Participants* | P value** |
|------------------------------|-------------------|---------------|-----------|
|                              | n (%)             | n (%)         |           |
| <b>Total</b>                 | 1310 (55%)        | 1090 (45%)    |           |
| <b>Sex</b>                   |                   |               | 0.37      |
| Men                          | 572 (43.7)        | 496 (45.5)    |           |
| Women                        | 738 (56.3)        | 594 (54.5)    |           |
| <b>Age years</b>             |                   |               | <0.001    |
| Under 30                     | 91 (7.0)          | 52 (4.8)      |           |
| 30-39                        | 629 (48.0)        | 450 (41.3)    |           |
| 40 or over                   | 590 (45.0)        | 588 (54.0)    |           |
| <b>Body Mass Index</b>       |                   |               | 0.66      |
| <23.0kg/m <sup>2</sup>       | 632 (48.8)        | 548 (50.6)    |           |
| 23.0-<25.0 kg/m <sup>2</sup> | 298 (23.0)        | 236 (21.8)    |           |
| ≥25.0 kg/m <sup>2</sup>      | 366 (28.8)        | 300 (27.7)    |           |
| <b>Residence</b>             |                   |               | 0.95      |
| Rural                        | 576 (44.4)        | 481 (44.5)    |           |
| Urban                        | 721 (55.6)        | 599 (55.5)    |           |
| <b>Education</b>             |                   |               | <0.01     |
| No university education      | 311 (23.9)        | 199 (18.3)    |           |
| University education         | 989 (76.1)        | 886 (81.7)    |           |
| <b>Occupation</b>            |                   |               | 0.51      |
| Manual worker                | 192 (16.2)        | 142 (14.6)    |           |
| Office assistant             | 421 (35.5)        | 323 (33.2)    |           |
| Skill worker                 | 66 (5.6)          | 57 (5.8)      |           |
| Professional                 | 328 (27.6)        | 294 (30.2)    |           |
| Manager                      | 190 (15.2)        | 158 (16.2)    |           |
| <b>Income</b>                |                   |               | 0.18      |
| ≤10,000                      | 291 (22.6)        | 246 (22.7)    |           |
| 10,001-20,000                | 486 (37.7)        | 380 (35.1)    |           |
| 20,001-30,000                | 305 (23.6)        | 246 (22.7)    |           |
| ≥30,001                      | 208 (16.1)        | 210 (19.4)    |           |

\*Numbers may not add to total sample size due to missing responses for some characteristics

\*\* $\chi^2$  comparing each baseline characteristic by participation status
